# Supplementary material for: ZNF281-miR-543 Feedback Loop Regulates Transforming Growth Factor-β-Induced Breast Cancer Metastasis
Source: PubMed Central journal article supplement — Mol Ther Nucleic Acids. 2020 May 21;21:98–107. doi: 10.1016/j.omtn.2020.05.020 (PMC7281305; doi:10.1016/j.omtn.2020.05.020), 2020-05-21
Supplement: mmc1.pdf [file mmc1.pdf]

OMTN, Volume 21

## **Supplemental Information**

### **ZNF281-miR-543 Feedback Loop Regulates Transforming Growth Factor- $\beta$ -Induced Breast Cancer Metastasis**

**Wei Ji, Qiang Mu, Xiang-Yu Liu, Xu-Chen Cao, and Yue Yu**

## Supplemental Material and Methods

### siRNA, miRNA and antibodies

The miR-543 mimic, miR-543 inhibitor, or the appropriate scrambled controls were purchased from RiboBio (Shanghai, China). The Snail, ZEB1 and ZNF281 gene-specific short interfering (siRNA), and non-specific control siRNA were also purchased from RiboBio. Recombinant human TGF $\beta$ 1 and EGF were purchased from R&D Systems (Redmond, WA, USA). Antibodies E-cadherin, N-cadherin, Vimentin, ZO-1, p-SMAD2 and  $\beta$ -actin were purchased from Cell Signaling Technology (Beverly, MA, USA). Antibodies Snail, ZEB1 and ZNF281 were obtained from Abcam (Cambridge, MA, USA).

### Plasmids construction

The 3'-UTR of ZNF281 containing miR-543 binding site was amplified from genomic DNA and cloned into psiCHECK2 vector (Promega, Madison, WI, USA) to generate ZNF281-wt. Site-directed mutagenesis was performed using the Site-Directed Mutagenesis Kit (TransGene, Beijing, China) to generate the ZNF281 3'-UTRmut reporter vector (ZNF281-mut). The ORF of human ZNF281 gene was amplified by PCR in 293FT cell line, the amplified fragments were subcloned into the pcDNA3.0/HA vector. The miR-543 promoter region (-1000 to +1) and the E-boxs mutated fragments were cloned into pGL3-Basic vector (Promega; P-wt, P-M1, P-M2, P-M1+2). The human Snail (-1794 to +83) and ZEB1 (-1932 to +101) promoter was amplified from genomic DNA using specific primers and cloned into pGL3-Basic vector. All constructs were confirmed by sequencing.

### Western blotting

Total protein was extracted by using RIPA buffer (50 mM Tris, 150 mM NaCl, 0.5% mM EDTA, 0.5% NP40) containing protease inhibitor cocktail tablet (Roche Molecular Biochemicals, Indianapolis, IN, USA) and centrifuged for 20 min at 12,000 rpm. 50  $\mu$ g of total protein was loaded and separated on the 10% sodium dodecyl sulfate -polyacrylamide gradient gel. The proteins were then transferred onto PVDF membranes (Millipore, Bedford, MA, USA) and blocked with 5% non-fat milk at room temperature for 1 hour. The membranes were then incubated at 4  $^{\circ}$ C overnight with primary antibodies. Then, the membranes were incubated with horseradish peroxidase-conjugated secondary antibody for 1 h at room temperature, and proteins were then detected using the ECL reagent (Millipore).

### Immunofluorescence

Cells were seeded onto glass coverslips in 24-well plates, washed with PBS, fixed in 4% formaldehyde solution for 30 min and then permeabilized with 0.2% Triton X-100/PBS for 15 min. Cells were blocked with 2% BSA in PBS for 30 min. Coverslips were incubated with primary antibodies overnight at 4 $^{\circ}$ C, followed by incubation with FITC-/TRITC-conjugated secondary

antibodies for 1 h at room temperature, and then stained with DAPI. Finally, coverslips were observed under a fluorescence microscope.

**Table S1. Oligonucleotides used for RT-qPCR**

| Name       | Sequence (5' to 3')      |
|------------|--------------------------|
| VIM up     | ACGTTTCGTCAGCAGTATGAAA   |
| VIM low    | GTTAGCAGCCTCAGAGAGGTC    |
| CDH1 up    | CAGCCACAGACGCGGACGAT     |
| CDH1 low   | CTCTCGGTCCAGCCCAGTGGT    |
| CDH2 up    | TCGCCATCCAGACCGACCCA     |
| CDH2 low   | GCAGTTGACTGAGGCGGGTGC    |
| TJP1 up    | CAGGAAATCTATTTCAAGGTCTGC |
| TJP1 low   | CATCACCAAAGGACTCAGCA     |
| ZNF281 up  | GAGCAGCAGGTGCCAAGGTG     |
| ZNF281 low | CTCCCCGTCCCGTGTCAATT     |
| SLUG up    | TTCGGACCCACACATTACCT     |
| SLUG low   | TTGGAGCAGTTTTTGCCTG      |
| SNAIL up   | GTCCGTCTGCCGCACCTGAG     |
| SNAIL low  | ACACGGCGGTCCCTACAGC      |
| TWIST1 up  | GCAAGAAGTCGAGCGAAGAT     |
| TWIST1 low | GCTCTGCAGCTCCTCGAA       |
| ZEB1 up    | TCAAAAGGAAGTCAATGGACAA   |
| ZEB1 low   | GTGCAGGAGGGACCTCTTTA     |
| ACTB up    | AGGCCAACCGCGAGAAGATGACC  |
| ACTB low   | GAAGTCCAGGGCGACGTAGCAC   |

**Table S2. Oligonucleotides used for ChIP**

| Name                | Sequence (5' to 3')  |
|---------------------|----------------------|
| miR-543 E-box-1 up  | ACGGCCGAACCCAAGGCAAG |
| miR-543 E-box-1 low | GTCACCACTGTCGATCAGCC |
| miR-543 E-box-2 up  | GCTCAGAGGCTCCATCAGGG |
| miR-543 E-box-2 low | CTGGGAGACATCTAACAGGT |
| ZEB1 Z1 up          | GACTCGAGCATTAGACACA  |
| ZEB1 Z1 low         | GCAGAGAGCACTACTTTCTA |
| ZEB1 Z2 up          | GAGCGGCTGTTGCTTCTTTC |

|              |                      |
|--------------|----------------------|
| ZEB1 Z2 low  | CGCGCACAAACCCCACGCAA |
| ZEB1 Z3 up   | GGAACAAGGCAGGAAAGGTA |
| ZEB1 Z3 low  | ACTGCAGCTGCGGTGCAAGT |
| ZEB1 Z4 up   | TAATGGGCGGCAACGGCCCT |
| ZEB1 Z4 low  | CCTAAACACGTATTTCTCG  |
| Snail S1 up  | GAGCAGCAGGTGCCAAGGTG |
| Snail S1 low | CTCCCCGTCCCGTGTCAATT |
| Snail S2 up  | GACAGTAGTTCTGCCCTTCA |
| Snail S2 low | GGGACCTGGTTAGAGTTTCG |
| Snail S3 up  | AGTCCAAACTCCTACGAGGC |
| Snail S3 low | AGGGAAGTGTGCTTTGGTGG |
| Snail S4 up  | TGATGTGCGTTTCCCTCGTC |
| Snail S4 low | AAGCGAGGCCTCTGCGAGGT |
